1 **Social foraging extends associative odor-food memory expression in fruit flies**  
2 **(*Drosophila melanogaster*)**

3

4 Aarti Sehdev<sup>1</sup>, Yunusa Mohammed<sup>1</sup>, Cansu Tafrali<sup>1</sup>, Paul Szyszka<sup>1,2,\*</sup>

5 <sup>1</sup>University of Konstanz, Department of Biology, Neurobiology, Konstanz 78457, Germany

6 <sup>2</sup>Present address: University of Otago, Department of Zoology, Dunedin 9054, New Zealand

7 \* Correspondence: [paul@szyszkalab.com](mailto:paul@szyszkalab.com)

8 **Keywords:** social interactions, social information transfer, odor-food learning, associative  
9 memory, collective foraging, *Drosophila melanogaster*, automated classical conditioning

10

11 **ABSTRACT**

12 Animals socially interact during foraging to share information about the quality and location  
13 of food sources. The mechanisms of social information transfer during foraging have been  
14 mostly studied at the behavioral level, and its underlying neural mechanisms are largely  
15 unknown. The fruit fly *Drosophila melanogaster* has become a model for studying the neural  
16 bases of social information transfer, as fruit flies show a rich repertoire of social behaviors  
17 and provide a well-developed genetic toolbox to monitor and manipulate neuronal activity.  
18 Social information transfer has already been characterized for fruit flies' egg laying, mate  
19 choice, foraging and aversive associative learning, however the role of social information  
20 transfer on associative odor-food learning during foraging are unknown. Here we present an  
21 automated foraging assay for groups of walking flies that allows studying the effect of group  
22 size on the formation and expression of associative odor-food memories. We found that  
23 inter-fly attraction increases with group size and that groups of flies exhibit extended odor-  
24 food memory expression, as compared to single or pairs of flies. We discuss possible  
25 behavioral and neural mechanisms of this social effect on odor-food memory expression.  
26 This study opens up opportunities to investigate how social interactions are relayed in the  
27 neural circuitry of learning and memory expression.

28

## 29 INTRODUCTION

30 Vertebrates often forage in groups to get a more accurate estimate of the location and  
31 quality of resources (Giraldeau and Caraco, 2000; Templeton and Giraldeau, 1996; Valone,  
32 1989; Ward and Zahavi, 1973). Insects also convey information about the location and  
33 quality about a food source through social interactions. For example, honey bees signal the  
34 direction and distance of food locations to other bees (Frisch, 1965), ants complement their  
35 individual memory of a route to food using trail pheromones left by scouts (Czaczkes et al.,  
36 2011), and stimulus enhancement and local enhancement at the food source improves  
37 foraging efficiency in bumble bees (Alem et al., 2016; Avarguès-Weber and Chittka, 2014;  
38 Leadbeater and Dawson, 2017; Worden and Papaj, 2005). These social effects on foraging  
39 have been mostly studied at the level of behavioral outcome, and the neural mechanisms of  
40 how social information transfer improves foraging are still unknown.

41 The fruit fly, *Drosophila melanogaster*, is a suitable model organism for studying the effects  
42 of social interactions on foraging at both the behavioral and the neuronal level. Fruit flies are  
43 gregarious (Lefranc et al., 2001; Navarro and del Solar, 1975) and demonstrate a rich  
44 repertoire of social behaviors that encompass communication about internal states (Suh et  
45 al., 2004), social information spread during odor avoidance (Ramdya et al., 2014), foraging  
46 (Abu et al., 2018; Lihoreau et al., 2016; Tinette et al., 2004) and predator-induced egg-  
47 retention (Kacsoh et al., 2015). Moreover, fruit flies socially learn (Battesti et al., 2012a;  
48 Danchin et al., 2018; Durisko and Dukas, 2013; Golden and Dukas, 2014; Lin et al., 2015;  
49 Mery et al., 2009; Sarin and Dukas, 2009) and they show improved aversive odor memory  
50 retrieval when in groups (Chabaud et al., 2009). However, it is still unknown whether social  
51 information transfer affects flies' associative odor-food learning during foraging.

52 The mechanistic understanding of foraging in fruit flies is unparalleled, both in regard to the  
53 neural mechanisms of odor-guided search (Galizia, 2014; Haverkamp et al., 2018; Wilson,  
54 2013) and feeding (Itskov and Ribeiro, 2013), and of associative odor-food learning (Burke et  
55 al., 2012; Huetteroth et al., 2015; Liu et al., 2012; Oswald and Waddell, 2015; Schwaerzel et  
56 al., 2003; Tempel et al., 1983; Thum et al., 2007), making the fruit fly a good model for  
57 studying the neural mechanisms of social interactions during foraging.

58 Here we investigated whether fruit flies socially interact during foraging and whether group  
59 size affects associative odor-food memory expression. We developed an automated foraging  
60 assay to study classical odor-reward conditioning in single flies and in groups of flies. We

61 conditioned flies to associate an odorant with a sucrose patch, and then tested their  
62 associative odor-food memory expression. We found that small groups (3 - 4 flies) and large  
63 groups (7 - 8 flies) showed extended odor-food memory expression compared to pairs of  
64 flies or single flies, and pairs of flies showed shorter memory expression than single flies.  
65 Moreover, flies in small or large groups, but not in pairs, were attracted to each other. These  
66 data suggest that flies socially interact during foraging and that these social interactions  
67 increase the efficiency of odor-guided food search.

68

## 69 **MATERIALS AND METHODS**

### 70 **Animals**

71 *Drosophila melanogaster* wild type Canton S were raised on a standard food medium (100  
72 mL contain 6.7 g fructose, 2.4 g dry yeast, 0.7 g agar, 2.1 g sugar beet syrup, 0.282 g ethyl  
73 paraben and 0.61 ml propionic acid). Flies were raised in a room with normal day light cycle,  
74 with an average temperature of 23.5 °C and 32% relative humidity. One to four days old flies  
75 were anesthetized with CO<sub>2</sub> and female flies were collected. Flies were starved for 2-3 days  
76 to motivate them to search for food. Flies were starved in a fly vial with filter paper soaked  
77 in water.

### 78 **Conditioning apparatus**

79 To condition groups of flies, we used an automated rotating platform with four concentric  
80 arenas (Figure 1A, B). The arenas were covered with a watch glass (7 cm diameter, 8 mm  
81 height in the center) which was coated on the inner side with Sigmacote (Sigma-Aldrich) to  
82 prevent flies from walking on the inside of the glass. The floor was made of a Teflon-coated  
83 fiberglass fabric (441.33 P, FIBERFLON, Konstanz). Pure odorants (ethyl acetate and 2,3-  
84 butanedione, Sigma-Aldrich) were stored in 20 ml vials (Schmidlin Labor and Service). The  
85 vials were mounted under the platform and the lid was pierced with a needle (Hypodermic-  
86 needle; 0.45 x25 mm, Sterican), allowing the odorant to diffuse through a hole (diameter: 5  
87 mm) in the platform through the Teflon fabric and into the arena. Each arena had two  
88 odorant sources. One odorant was used as sucrose-paired conditioned stimulus (CS+) and  
89 the other odorant was used as unpaired conditioned stimulus (CS-). At the location of the  
90 CS+, 20 µl of oversaturated sucrose-ethanol solution was pipetted onto the fiberglass fabric

91 and blow-dried for 20 minutes, producing a thin layer of pure sucrose on a round patch with  
92 a diameter of 10 mm. The position of the CS+ and CS- were always switched between the  
93 conditioning and the test (e.g. if CS+ was at the inside position during conditioning, it was at  
94 the outside position during the test, and in half of the experimental runs the CS+ was at the  
95 inside position during conditioning, and in the other half at the outside position); each  
96 odorant was used equally often as CS+ and CS-. To change the floor between experimental  
97 phases, the platform was rotated underneath the arenas; the arenas themselves did not  
98 move. The angular rotation speed of the platform was  $360^\circ/25$  s which corresponded to a  
99 speed of 2.6 cm/s in the center of the arena (the distance between center of the table and  
100 the center of the arena is 10.25 cm). The conditioning apparatus was placed in an air suction  
101 hood in order to remove odorants. All experiments were performed in the dark to eliminate  
102 visual stimuli. The arena was back-illuminated with infrared light (850 nm, SOLAROX LED  
103 Strip), which is not visible to flies, and experiments were video recorded with an infrared  
104 sensitive camera (infrared Camera Module v2, Pi NoiR, connected to a Raspberry Pi 3, Model  
105 B V1.2) at 15 frames/s. The rotating motor was controlled via TTL pulses through the  
106 Raspberry Pi. The rotation of the table and the video recordings were controlled with  
107 custom-written software in Python (Stefanie Neupert).

### 108 **Odor-food conditioning**

109 All experiments were done between 10:00 and 12:00 or after 15:00 during periods when  
110 flies show higher foraging activity (Breugel et al., 2017). Each experimental run contained 4  
111 differently sized groups (“single”, “pair”, “small group”, “large group”), and the positions of  
112 the 4 arenas used for the 4 differently sized groups were balanced across experimental runs.

113 One experimental run consisted of four phases:

114 Acclimatization (Figure 1B, solid arcs): Flies were sucked out from the starvation vials using a  
115 tube aspirator and placed into an arena that had no odorant source and were allowed to  
116 acclimatize for 10 minutes.

117 Conditioning (Figure 1B, dotted arcs): The floor was rotated counterclockwise by  $22.5^\circ$  and  
118 the CS+ paired with sucrose and the CS- without sucrose were presented for 7 minutes.

119 Pause (Figure 1B, dashed arcs): The floor was rotated by  $22.5^\circ$  and replaced by a new floor  
120 without odorants or sucrose. The pause lasted for 5 seconds.

121 Test: The floor was rotated by 22.5° and replaced by a floor which had the CS+ and CS- but  
122 without sucrose. CS+ and CS- positions were switched from conditioning. The test phase  
123 lasted for 7 minutes.

124 Videos were recorded during the conditioning and test. After each experimental run, all flies  
125 were discarded and the Teflon fabric floor was rinsed with hot water and soap to remove the  
126 odorants and the sucrose patch.

## 127 **Fly tracking**

128 Video recordings were analyzed using the software Fiji (ImageJ 1.51s Wayne Rasband NIH,  
129 USA). We removed the first 30 frames due to compression artifacts and converted the video  
130 to grayscale. Then we did a Z projection to get the maximum intensity projection over the  
131 whole video, and calculated the difference per frame between the maximum intensity  
132 projection and the original video. This gave us a clear image of flies moving around the arena  
133 for tracking. We used this output to track flies using the plugin TrackMate (Version: 3.5.3,  
134 Tinevez et al., (2017)). We used a Downsample LoG detector to identify flies (blob diameter  
135 = 13 pixels, downsampling = 3, threshold = 6-8). To generate the tracks, we used the Simple  
136 LAP Tracker, with the following parameters: linking distance = 150 pixels, max gap closing =  
137 150 pixels and maximal frame gap = 3 frames. For the conditioning data, we only extracted  
138 the x and y coordinates of each fly per frame. For the test data, we extracted the x and y  
139 coordinates per frame as well as the identity of the fly throughout the recording. We  
140 inspected all tracking results visually and corrected the tracks manually to connect the  
141 missing links and afterwards we extracted the x and y coordinates for the analysis.

## 142 **Data analysis**

### 143 **Normalizing arenas for comparison**

144 For both the conditioning and the test datasets, we centralized each arena so that the center  
145 point of the circular arena was at (0, 0). The center point was determined by taking the  
146 midpoint between the CS+ and CS- locations; the x and y coordinates of the CS+ and CS-  
147 were recorded manually. We then converted each Cartesian coordinate to polar  
148 coordinates, in order to rotate each arena so that the CS+ location was at the top of the  
149 arena and the CS- was at the bottom. We took the distance of the CS+ to the center as a  
150 reference radius of 1, and normalized all coordinates to this radius. We then filtered out any

151 points that had a radius equal to or greater than 1.3 to remove tracking errors. Note that for  
152 the conditioning dataset, only the x and y coordinates of a fly per frame were recorded. For  
153 the test dataset, the x and y coordinates per frame were recorded, but also the identity of  
154 the fly across frames (tracking data are available in Data S1).

### 155 **Visit probability maps**

156 Visit probability maps were generated only for the test dataset. For every individual fly, we  
157 divided the arena into 20 x 20 pixel bins. For each frame, we gave the pixel bin that  
158 contained the coordinate of the fly a score of 1, and gave all of the other bins a score of 0.  
159 We summed the scores of each pixel bin over all frames and then normalized by the track  
160 length for each individual. For each group size, we then took the mean of each pixel bin over  
161 all individual fly tracks. We used the same analysis for the time-binned visit probability maps  
162 by looking only at the frames that occurred during the time bin.

### 163 **Calculating the distance of individual flies to the CS+ and CS-**

164 We calculated the distance of each fly to the CS+ and to the CS- in every frame using:

$$165 \text{ Euclidean distance} = \sqrt{(x - x_0)^2 + (y - y_0)^2}$$

166 Where x and y are the Cartesian coordinates of the fly, and  $x_0$  and  $y_0$  are the Cartesian  
167 coordinates of either the CS+ or the CS-.

### 168 **Approach probability**

169 For the conditioning data, the coordinates of the flies were tracked for each frame. For every  
170 frame of the experiment, we scored each point: if the fly was closer to the CS+ than the CS-,  
171 it was given a score of 1, otherwise it was given a score of 0. We then divided the data into  
172 one-minute time bins. For every experiment we calculated the number of ones and zeros in  
173 each time bin; if there were more ones than zeros, the time bin was given a score of 1 for  
174 that experiment, otherwise it was given a score of 0. We then took the mean for each time  
175 bin over all experimental runs.

176 For the test data, we used a similar method, however since we had the fly identities over the  
177 whole video, we calculated the approach probability using the individual fly tracks. This  
178 allowed us to calculate the approach score for each individual fly. A fly received a score of 1  
179 when she spent more time closer to the CS+ than the CS- and a 0 when she spent more time

180 closer to the CS- than to the CS+ during the experimental run. If more flies in a particular  
181 experimental run scored a 1 than scored a 0, then the experimental run was scored a 1,  
182 otherwise it was scored a 0. Moreover, we divided each track into one-minute time bins and  
183 for each experimental run each time was scored 1 (flies were closer to the CS+) or 0 (flies  
184 were closer to the CS-).

### 185 **Latency to the CS+ and the CS-**

186 For the test dataset, we identified for each individual the first frame (latency) that the  
187 individual was 0.5 cm or closer to the center of the CS+ or CS-. We firstly took the mean  
188 latency to the CS+ or CS- across all flies in one experimental run, and then took the mean  
189 across the 30 experimental runs for each group size.

### 190 **Calculating the distance between flies**

191 For the test dataset, we used the rotated Cartesian coordinates to calculate the Euclidean  
192 distance between every fly in each frame of the experiment. We divided the distances into  
193 bins of 5 mm and counted the occurrences of each distance per experimental run.

### 194 **Simulating distances between flies due to chance**

195 For the test dataset, we selected flies according to their group size, and randomly sampled  
196 entire fly tracks from different experimental runs of the same experiment. We simulated as  
197 many experimental runs as there were real experimental runs, and we also simulated as  
198 many flies as were in each experimental run. We then overlaid these tracks and calculated  
199 the Euclidean distance between flies for the simulated experiments as we did for the real  
200 experiments.

### 201 **Calculating encounters between flies**

202 We defined an encounter as the center of one fly being maximum two fly lengths (5 mm)  
203 away from the center of another fly. We calculated the Euclidean distance between all flies  
204 as before. We selected the distances that were less than or equal to 5 mm (the encounter  
205 distances). Since we had the identity of every fly per experimental run, we could calculate  
206 the number of encounters for every fly and the length of these encounters.

207 For the mean encounter number per fly per experimental run, we calculated the total  
208 number of encounters for one experimental run, multiplied it by two as there were two flies

209 involved in each encounter, and then divided it by the number of flies in the arena. For the  
210 mean encounter length per experimental run, we summed the length of all encounters and  
211 divided by the total number of encounters per experimental run. We repeated this analysis  
212 for the simulated data.

### 213 **Statistical analysis**

214 For all data analysis, R version 3.5.0 was used (R Core Team, 2018). All statistics were  
215 performed using Bayesian data analysis, based on Korner-Nievergelt et al., (2015).

216 To investigate the effect of group size on conditioned approach probability for the CS+, we  
217 used a binomial generalized linear model (GLM), with conditioned approach probability as  
218 the binary response variable (1 = approach, 0 = no approach). We used the logistic  
219 regression (logit) link function. The group size (“single”, “pair”, “small group” and “large  
220 group”) was used as the explanatory variable. We used an improper prior distribution (flat  
221 prior) and simulated 100 000 values from the posterior distribution of the model parameters  
222 using the function “sim” from the package “arm”. The means of the simulated values from  
223 the posterior distributions of the model parameters were used as estimates, and the 2.5 %  
224 and 97.5 % quantiles as the lower and upper limits of the 95 % credible intervals. We used  
225 this GLM to compare the conditioned approach probability of each group size against  
226 chance. For each group size, we calculated the proportion of simulated values from the  
227 posterior distribution that were larger than 0.5. A value of 0.5 indicates that flies spend  
228 equal time in the two halves of the arena, whereas a value of 1 indicates that flies spent all  
229 of the time in the half of the arena containing the CS+, and a value of 0 indicates that flies  
230 spent all of the time in the half of the arena containing the CS-. If the proportion of  
231 simulated values was significantly greater than 0.5, we determined that flies spent more  
232 time in the half of the arena containing the CS+ than predicted by chance (represented by  
233 filled circles in plots). To test for differences between conditioned approach probabilities for  
234 different group sizes, we calculated the proportion of simulated values from the posterior  
235 distribution that were larger for one group compared to another group. We declared an  
236 effect to be significant if the proportion was greater than 0.95 (\*). Proportions greater than  
237 0.99 are marked “\*\*\*” and greater than 0.999 marked “\*\*\*\*”. We performed this analysis for  
238 the whole recording: for the different time bins, we compared the conditioned approach  
239 probability of the different group sizes within a single time bin, not between them.



240 To test whether the latency to reach the CS+ or CS- depends on group size, we used a linear  
241 model (LM). The latency to the CS+ or to the CS- was the response variable, and the group  
242 size was used as the explanatory variables. We used the same methodology as previously  
243 used in the GLM to simulate values from the posterior distribution and generate the means  
244 and the 95 % credible intervals. To test for differences, we calculated the proportion of  
245 draws from the posterior distribution for which the mean of each draw was smaller in the  
246 experimental dataset than the mean of each draw of the simulated dataset. We declared an  
247 effect to be significant if the proportion was greater than 0.95.

248 To investigate whether grouped flies differ in the number of their inter-fly encounters from  
249 random (simulated data), we used an LM for each distance bin. The number of occurrences  
250 of that distance was the response variable, and the type of data (experimental or simulated  
251 data) was used as the explanatory variable. We used the same method as specified above to  
252 test for differences.

253 To investigate whether the encounter number and lengths were different to random  
254 (simulated data), we used an LM with either encounter number or encounter length as the  
255 response variable, and the type of data (experimental or simulated data) as the explanatory  
256 variables. We used the same method as specified above to test for differences.

257 To determine whether the mean encounter number per fly differed between group sizes, we  
258 randomly assigned pairs of experimental and simulated encounter numbers from different  
259 experimental runs for each group size (Figure 2F). For each pair, we then subtracted the  
260 simulated encounter number value from the real encounter number value (difference  
261 between encounters). This allowed us to compare between group sizes as by removing the  
262 simulated value, we remove the number of encounters that could be due to chance, which is  
263 correlated with group size. To test for differences between group sizes, we used an LM. The  
264 response variable was the “difference between encounters”. The explanatory variable was  
265 the different group size (“pair”, “small group” and “large group”). The large group was used  
266 as the reference level. We used the same method as specified above to draw inferences  
267 about the differences between the large group and the other two group sizes.

268

269

## 270 RESULTS

271 To investigate whether group size affects associative odor-food memory in flies, we  
272 developed an automated conditioning assay to condition four groups of flies simultaneously  
273 (Figure 1A, B). The learning assay consisted of a computer-controlled rotating table platform  
274 with four concentric arenas. This design allowed us to transfer flies from conditioning to the  
275 test without anesthesia and with minimal mechanical disturbance, which can alter fruit flies'  
276 behavior (Barron, 2000; Bartholomew et al., 2015; Trannoy et al., 2015). We compared four  
277 different sized groups of flies: one fly (single), two flies (pair), three or four flies (small group)  
278 and seven or eight flies (large group) (Figure 1C). Both the training phase and test phase  
279 lasted for 7 minutes. During the 7-minutes long conditioning, two odorants (2,3-butanedione  
280 and ethyl acetate) were presented at opposite sides of the arena; one odorant (conditioned  
281 stimulus, CS+) was paired with dried sucrose and the other odorant was not (CS-). During  
282 conditioning, flies were allowed to forage around the arena and find the food and odorant  
283 source.

### 284 **Flies aggregate on the odorant-sucrose patch during conditioning and learn to associate** 285 **the odorant with sucrose**

286 Flies of all group sizes showed a high probability to approach the odorant (CS+)-sucrose  
287 patch, implying that they were feeding on the sucrose (mean approach probability over the  
288 last minute- single, small group and large group: >0.999, pair: 0.97) (Figure 1D). For a given  
289 experimental run the approach probability was 1 if the flies spent more time closer to the  
290 CS+ than to the CS- and 0 if the fly spent more time closer to the CS- than to the CS+. We did  
291 this for one-minute time bins, and took the mean for each bin across experimental runs to  
292 get a mean approach probability per group size.

293

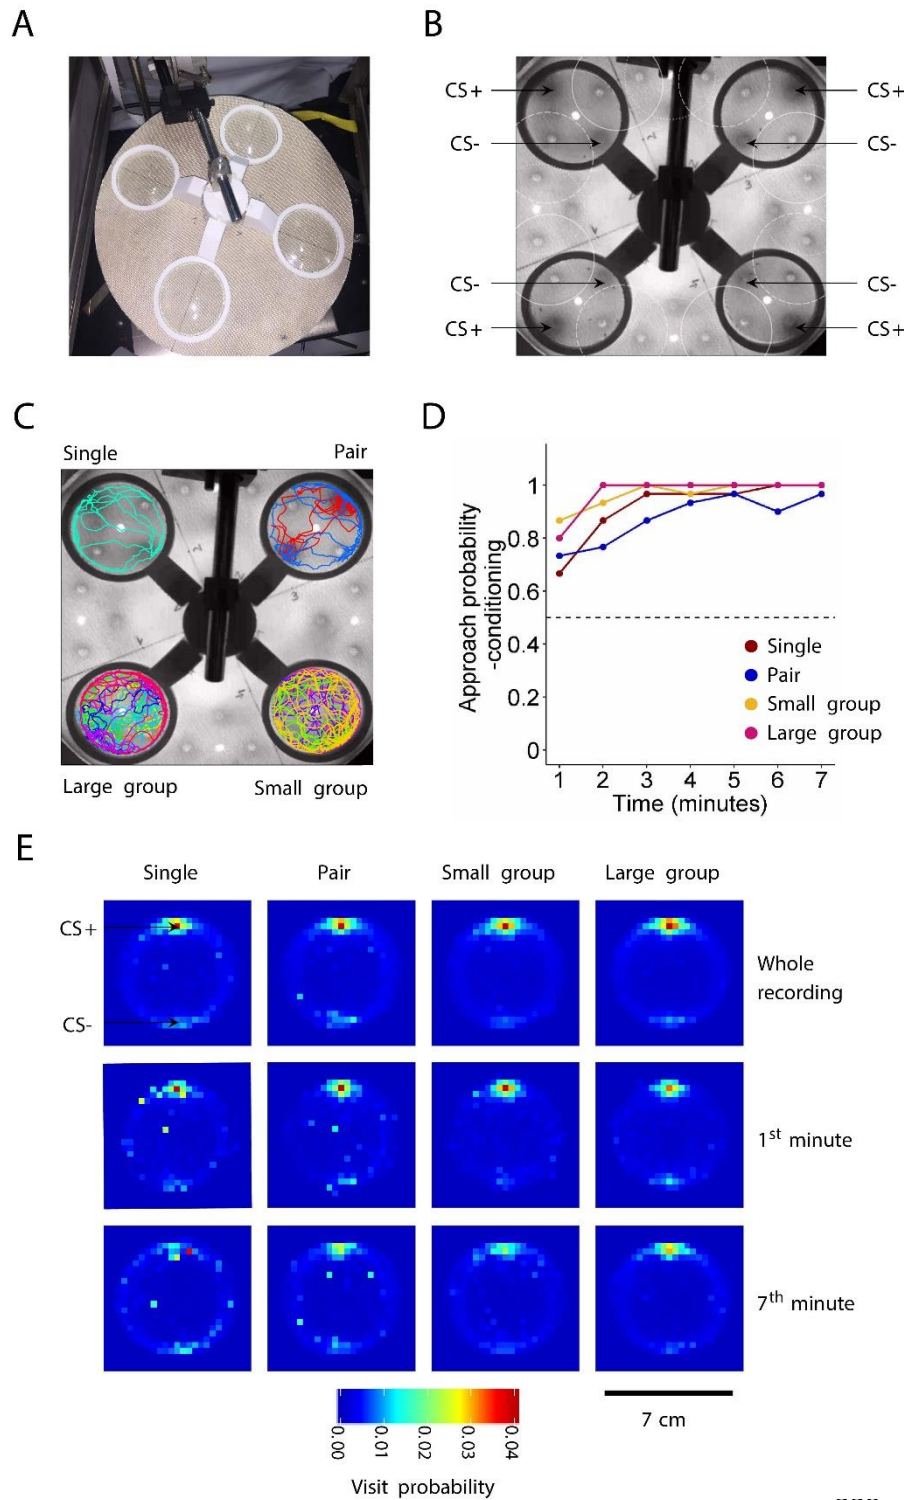

340 represents the approach probability of 0.5 (chance).  
 341 (E) Visit probability maps for each group size (columns) for the entire duration of the recording, the first minute  
 342 of recording and the second minute of recording (rows). Each bin shows the mean binary value across all  
 343 experimental runs. N = 30 experimental runs for all groups; single flies: N = 30 individuals; pairs: N = 60  
 344 individuals; small group: N = 118 individuals; large group: N = 229 individuals.

345 Flies were transferred from the conditioning to the test by rotating the platform (Figure 1B).  
 346 In between conditioning and test there was a pause, where the platform was rotated to a  
 347 neutral segment where there were no odorants or sucrose present. The pause lasted 5 s,

348 and then platform was rotated to the test segment. During the test, the positions of the CS+  
349 and the CS- were switched and there was no sucrose, thus flies could not rely on  
350 remembering the location of the sucrose patch (Kim and Dickinson, 2017) and had to follow  
351 the olfactory CS+ to search for the expected food. To visualize conditioned approach to the  
352 CS+, we projected the flies' trajectories on a plane and calculated the probability across flies  
353 to visit a particular pixel bin (Figure 1E). Throughout conditioning, flies of all group sizes  
354 showed highest visit probabilities to areas around the CS+. The increased visit probabilities  
355 around the CS+ persisted over the entire 7 minutes of the test, confirming that flies learned  
356 to associate the CS+ with food.

357 **Flies conditioned and tested in groups exhibit extended associative odor-food memory**  
358 **compared to flies conditioned and tested alone or in pairs**

359 We next asked whether group size affects the expression of associative odor-food memory  
360 during the test and determined the conditioned approach probability for the CS+ (Figure 2A).  
361 We calculated the conditioned approach probability for the CS+ by the following steps: 1) If a  
362 fly spent more time near the CS+ than the CS-, it scored a one, otherwise it scored a zero. 2)  
363 If an experimental run had more flies scored with one than zero, the experimental run itself  
364 was scored as 1, otherwise zero. 3) We took the mean across experimental runs to get a  
365 conditioned approach probability per group size. During the test, all group sizes showed a  
366 conditioned approach probability for the CS+ that was significantly higher than chance  
367 ( $p(\text{large group} > 0.5) > 0.999$ ,  $p(\text{small group} > 0.5) > 0.999$ ,  $p(\text{pair} > 0.5) = 0.983$ ,  $p(\text{single} >$   
368  $0.5) > 0.999$ ), showing that they had formed an associative odor-food memory (Figure 2A).  
369 Both the large group and the small group showed significantly higher conditioned approach  
370 probabilities than the pair group ( $p(\text{large group} > \text{pair}) = 0.983$ ,  $p(\text{small group} > \text{pair}) =$   
371  $0.968$ ), however there were no differences between any of the other group sizes (see Table  
372 S1). There was no differences between group sizes for how quickly the flies approached the  
373 CS+ (Figure S1A), however the pair approached the CS- significantly faster than the single fly  
374 or the small group ( $p(\text{single} > \text{pair}) = 0.982$ ,  $p(\text{small group} > \text{pair}) = 0.981$ ) (Figure S1B).

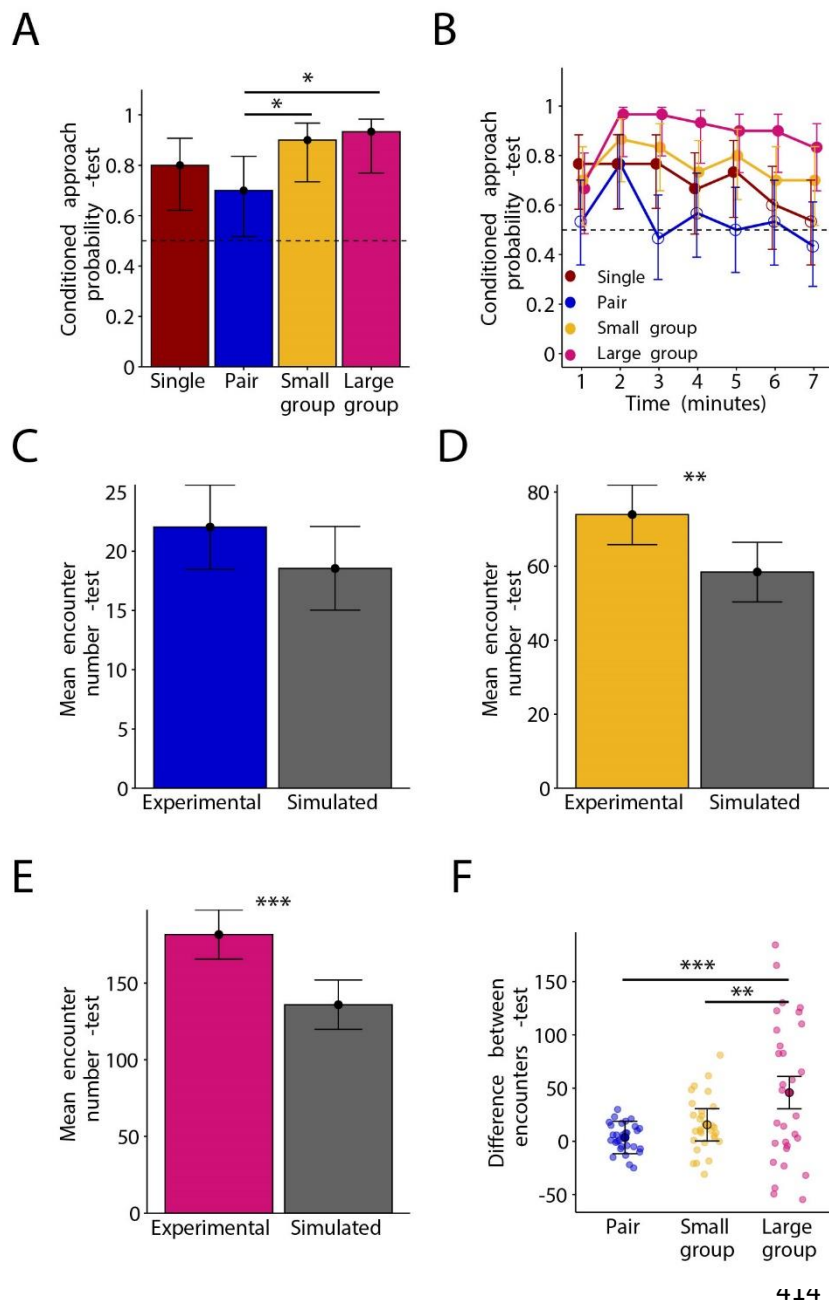

**Figure 2: Group size affects associative odor-food memory expression and inter-fly encounters during the test.**

**(A)** Conditioned approach probability for the CS+ for the single fly group (red), the pair group (blue) the small group (yellow) and the large group (pink) during the test. Bars represent the mean binary score across all experimental runs. Whiskers represent the 95 % credible intervals. The dashed line indicates the conditioned approach probability due to chance (0.5). Stars represent significant differences in conditioned approach probability between groups.

**(B)** Conditioned approach probability for the CS+ over one-minute time bins during the test. Colors, dashed line and whiskers are the same as in (A). The points represent the mean binary score across all experimental runs within a time bin. Filled points are conditioned approach probabilities that are significantly different to chance, empty points are not significantly different to chance. For statistical comparisons between groups, see Table S1.

**(C)** Mean inter-fly encounter number per fly per experimental run for the pair (blue) and the simulated pair (grey). Bars represent the mean across experimental runs. Vertical lines represent the 95 % credible intervals.

**(D)** Same as (C) for the small group (yellow) and the simulated small group (grey).

**(E)** Same as (C) for the large group (pink) and the simulated large group (grey). Stars represent significant differences in mean encounter length between the real and simulated group (\*:  $p(\text{experimental} > \text{simulated}) > 0.99$ ).

**(F)** Paired differences between mean encounter numbers across experimental runs. Stars represent significant differences between groups (\*:  $p(\text{large group} > \text{small group}) > 0.95$ , \*\*:  $p(\text{large group} > \text{pair}) > 0.999$ ). Black circles represent the mean difference in encounter number between experimental runs. Colors and whiskers are the same as in A.

424

425 To investigate the time course of memory expression, we calculated the conditioned  
 426 approach probability over one-minute time bins (Figure 2B). During the first minute of the  
 427 test, the single fly showed a higher conditioned approach probability than the pair ( $p(\text{pair} >$   
 428  $\text{single}) = 0.031$ ). Between the 2<sup>nd</sup> to 7<sup>th</sup> minutes, the large group showed higher conditioned



429 approach probabilities than both the single fly group and the pair group throughout most  
430 other bins tested (Table S1). The large group also showed higher conditioned approach  
431 probability than the small group during the 4<sup>th</sup> minute and the 6<sup>th</sup> minute. The pair group  
432 showed the lowest conditioned approach probability which was only significantly different  
433 to chance during the second minute ( $2^{\text{nd}}$  minute:  $p(\text{pair} > 0.5) = 0.997$ ), and during the 3<sup>rd</sup> to  
434 7<sup>th</sup> minutes, the paired group showed a significant lower approach probability than the large,  
435 small and single fly groups (Table S1, S2). These results suggest that flies conditioned and  
436 tested in a large group express a longer associative odor-food memory than flies conditioned  
437 and tested in smaller groups or single flies, and flies conditioned and tested in pairs express  
438 shorter associative odor-food memory than single flies or flies in groups.

#### 439 **Flies tested in groups – but not in pairs – exhibit more inter-fly encounters than random**

440 We next asked whether flies socially interact, which could potentially allow them to share  
441 information with each other about the location of the predicted food source and thus could  
442 explain the extended associative memory of the large group. To assess whether group size  
443 affects the frequency of social interactions we measured the number of inter-fly distances  
444 and compared it with the number of expected random distances. We calculated the  
445 distances between all flies conditioned in groups in each video frame during conditioning to  
446 see if they approached each other. To determine whether these distance distributions could  
447 be explained merely due to flies randomly encountering each other in the arena, we  
448 simulated 30 new experimental runs by randomly sampling fly locations from all  
449 experimental runs for each video frame. We then calculated the distances between these  
450 simulated groups of flies in each video frame (Figure S2A, Table S3). For the large group  
451 there were more short inter-fly distances (0-5 and 5-10 mm) than for the simulated group.

452 We chose a distance of 5 mm between fly centers as a threshold for inter-fly encounters  
453 where flies could potentially socially interact. Flies in the small and large group made  
454 significantly more encounters (approached each other by 5 mm or less) than the simulated  
455 groups of flies, but not the pair ( $p(\text{large group} > \text{simulated large group}) > 0.999$ ,  $p(\text{small}$   
456  $\text{group} > \text{simulated small group}) = 0.996$ ,  $p(\text{pair} > \text{simulated pair}) = 0.917$ ) (Figure 2C-E).

457 To compare encounter number across group sizes, we needed to correct for trivial  
458 differences in encounters that are just due to differences in the group sizes (in larger groups  
459 there is a higher chance for random inter-fly encounters). We corrected for these trivial

460 differences in encounter number by the following procedure: We randomly took an  
461 experimental run from the experimental and simulated datasets and subtracted the number  
462 of encounters between the two experimental runs (Figure 2F). By subtracting the number of  
463 encounters in the simulated runs, we removed the number of encounters per experimental  
464 run that could be due to random encounters. The encounter number was significantly higher  
465 for the large group compared to the small group and the pair ( $p(\text{large group} > \text{pair}) > 0.999$ ,  
466  $p(\text{large group} > \text{small group}) = 0.996$ ). There were no differences in encounter length  
467 between any group size and their simulated groups (Figure S2B).

468 The increased number of encounters in the larger group indicates that flies are more  
469 attracted to each other when they are in large groups than when they are in small groups or  
470 pairs. More encounters allow more opportunities for social interactions between flies, which  
471 in turn could underlie the longer associative memory expression of the large group as  
472 compared to smaller groups or single flies.

473

## 474 **DISCUSSION**

475 We developed an automated conditioning assay for walking fruit flies that allows analyzing  
476 the behavior of individual flies during foraging. We used this assay to investigate how social  
477 interactions affect odor-food learning in single flies and in groups of flies. Flies in groups  
478 showed extended expression of the associative odor-food memory as compared to single  
479 flies or pairs of flies. Moreover, flies in larger groups were more attracted to each other than  
480 flies in smaller groups. These data suggest that foraging in groups of more than two flies  
481 facilitates social information transfer about the quality of a food source (during odor-food  
482 learning) or about the location of the predicted food source (during odor-guided food  
483 search).

### 484 **Social information transfer during foraging**

485 Fruit flies accumulate on fermenting fruit which they find by following the odorants released  
486 by fermenting fruit (Becher et al., 2012; Kellogg et al., 1962; Semmelhack and Wang, 2009)  
487 and by following aggregation pheromones released by males (Bartelt et al., 1985; Lin et al.,  
488 2015; Mercier et al., 2018) and females (Lebreton et al., 2017). In the group, fruit flies  
489 transfer information to other flies about their internal state, such as stress (Suh et al., 2004)

490 and about the location and quality of resources during mate choice (Danchin et al., 2018;  
491 Mery et al., 2009), egg laying (Battesti et al., 2012b; Durisko and Dukas, 2013; Lin et al.,  
492 2015; Sarin and Dukas, 2009), and foraging (Lihoreau et al., 2016; Tinette et al., 2004).  
493 During foraging, primer flies search for the most favorable food patch and other flies  
494 aggregate at those food patches after socially interacting with the primer flies (Tinette et al.,  
495 2004), thus through local enhancement of food patches, the entire group of flies appears to  
496 benefit from the transmitted information from primer flies.

497 Since fruit flies forage, lay eggs and mate during aggregation, it is plausible that they have  
498 adapted to transmit information to each other about the environment through social  
499 interactions. Our finding of extended expression of associative odor-food memories in  
500 groups together with the positive correlation between group size and inter-fly attraction  
501 suggests that associative odor-food learning or memory expression also benefits from social  
502 information transfer during aggregation. The positive correlation between group size and  
503 inter-fly attraction that we found is in line with a previous study where the number of inter-  
504 fly attraction was higher in larger than in smaller groups (20-40 versus 10 flies) (Simon et al.,  
505 2012). To our knowledge, such an increase in inter-animal attraction with increasing group  
506 size has not yet been reported in vertebrates (Miller and Stephen, 1966).

### 507 **Social effects on odor-food learning**

508 While we found extended memory expression in larger groups, we found shorter memory  
509 expression in pairs of flies as compared to single flies or groups of 4 or 8 flies. This finding  
510 was surprising, and we have no good explanation for this phenomenon. We will therefore  
511 constrain our discussion the social effects on odor-food learning and memory in groups  
512 larger than two.

513 The extended expression of associative odor-food memory in groups of flies could be a result  
514 of social information transfer during the formation of the odor-food memory (during  
515 conditioning) or during the retrieval of the odor-food memory (during the memory test).  
516 Since our experiments were performed in the dark, flies could have transferred information  
517 socially via olfactory stimuli (Jallon, 1984; Keesey et al., 2016; Lebreton et al., 2017; Lin et al.,  
518 2015), gustatory stimuli (Schneider et al., 2012) sound (Tauber and Eberl, 2003), substrate-  
519 borne vibration (Fabre et al., 2012) and touch (Ramdya et al., 2014), but not via visual cues



520 (Danchin et al., 2018; Ferreira and Moita, 2019; Golden and Dukas, 2014; Mery et al., 2009;  
521 Sarin and Dukas, 2009).

522 During conditioning, the presence of other flies at the sucrose patch could increase the  
523 reinforcing strength of the sucrose since the presence of other flies indicates that the food  
524 patch is good. Indeed, flies prefer food sources with other flies present over food sources  
525 without any flies (Lihoreau et al., 2016; Tinette et al., 2004). Alternatively, the presence of  
526 other flies at the sucrose patch may be an additional appetitive reinforcing stimulus. The role  
527 of conspecifics as a positive reinforcer has been previously demonstrated in honey bees,  
528 where antennal touching of a nestmate acts as positive reinforcer during odor conditioning  
529 (Cholé et al., 2019). The fact that fruit flies are attracted to each other (Lefranc et al., 2001;  
530 Simon et al., 2012; Tinette et al., 2004) makes it plausible to assume that flies could also act  
531 as an additional positive reinforcer at the sucrose patch.

532 The reinforcing function of other flies could be mediated by dopaminergic neurons, because  
533 dopaminergic neurons mediate the reinforcing function of sucrose (Liu et al., 2012) and  
534 because dopamine itself has an effect on the sociality of flies: inter-fly attraction decreases  
535 in flies that have a deficiency in dopamine released from neurons and hypodermal cells  
536 (Fernandez et al., 2017).

### 537 **Social effects on odor-food memory expression**

538 Besides there being a learning effect, the extended odor-food memory expression could be a  
539 memory retrieval effect. Memory retrieval could be affected by the social interactions during  
540 the memory test, as flies that had learned the association between CS+ and sucrose could  
541 transfer information about the location of the predicted sucrose patch to flies that have  
542 failed to learn. Information transfer from experienced to naïve flies can affect group level  
543 behavior during odor avoidance (Ramdya et al., 2014), aversive memory retrieval (Chabaud  
544 et al., 2009), mate choice (Danchin et al., 2018; Mery et al., 2009), oviposition site choice  
545 (Battesti et al., 2012b; Sarin and Dukas, 2009) and predator-induced egg-retention (Kacsoh  
546 et al., 2015). Moreover, a theoretical study predicted that social interactions can increase  
547 performance during odor-guided foraging (Torney et al., 2009).

548 Alternatively, flies that located the CS+ first during the test could serve as an attractive  
549 reinforcing stimulus (see discussion above and (Lihoreau et al., 2016; Tinette et al., 2004)),

550 thus appetitive learning of the CS+ could continue throughout the test. This ongoing  
551 appetitive learning of the CS+ during the test would appear as extended associative memory  
552 expression in our study.

553 Another possible explanation for the extended memory expression could be reduced  
554 memory extinction due to social interaction at the CS+. Memories can be extinguished when  
555 the CS+ is presented without reinforcement (Lagasse et al., 2009; Schwaerzel et al., 2002),  
556 which is effectively what occurs throughout the test in our study. In flies, extinction of odor-  
557 sucrose memories is mediated by dopaminergic neurons that encode reinforcement during  
558 aversive odor learning (Felsenberg et al., 2017): lack of reward during CS+ induced memory  
559 retrieval activates those dopaminergic neurons, and this activation counteracts the  
560 associative odor-food memory. The presence of other flies at the CS+ could provide an  
561 appetitive stimulus and thereby prevent the activation of these extinction mediating  
562 dopaminergic neurons.

### 563 **Limitations of the study and outlook**

564 Our data demonstrate that flies express an extended odor-food memory when conditioned  
565 and tested in groups. However, our experimental design does not allow conclusions on  
566 whether this extended memory expression results from being in the group during odor-food  
567 learning (conditioning) or during odor-guided search (memory test). To discriminate  
568 between these two possibilities one could test whether flies conditioned in a group and  
569 tested alone (or conditioned alone and tested in a group) still show extended memory  
570 expression as compared to control flies that were conditioned and tested alone.

571 We analyzed the walking behavior of individual flies during the memory test, but not during  
572 the conditioning because we could not separate flies from each other when they clustered at  
573 the sucrose patch due to a lack of spatial resolution. By using cameras with higher spatial  
574 resolution, this assay can be extended to a high-throughput assay for multiple parallel fly  
575 groups that would allow automatic tracking of all individuals, classifying of patterns of  
576 pairwise and higher-order interactions between individuals, as well as stereotyped behaviors  
577 in individuals (Berman et al., 2016; Branson et al., 2009). This assay could help reveal  
578 external factors (e.g., fly density, the ratio of informed to uninformed flies) and internal  
579 factors (e.g., metabolic, genetic, or circadian states) that influence learning in social

580 contexts, and it would also allow studying the neural basis of social effects on foraging, by  
581 disentangling sensory processing and memory formation.

582 To identify the sensory bases of information transmission between flies, one could test the  
583 effect of temporarily perturbing their ability to smell, see and mechanosense by expressing a  
584 temperature-sensitive switch for synaptic transmission in defined neuron populations  
585 (Kitamoto, 2001). Likewise, neuronal perturbation experiments would help identifying the  
586 neurons that encode the valence of social information and reveal how these neurons  
587 integrate with the neurons known to encode the hedonic and caloric value of food  
588 (Huetteroth et al., 2015). Moreover, to investigate whether information transmission during  
589 foraging is affected by the fly's predisposition to forage, one could use the two naturally  
590 occurring *foraging* gene *Drosophila* mutants. "Rovers" move more during foraging and  
591 demonstrate improved short term memory, whereas "sitters" move less and show an  
592 improved long term memory (Mery et al., 2007; Osborne et al., 1997). Since both foraging  
593 and aversive memory expression are affected by social context (Kohn et al., 2013),  
594 experiments using these morphs would help to assess whether improved memory  
595 expression or learning during foraging in groups is genetically predetermined.

596

## 597 **CONFLICT OF INTEREST**

598 The authors declare that the research was conducted in the absence of any commercial or  
599 financial relationships that could be construed as a potential conflict of interest.

## 600 **AUTHOR CONTRIBUTIONS**

601 PS conceptualized and designed the study. CT performed the data collection. CT and YM  
602 performed the pilot experiments. AS, CT and YM prepared the video data for analysis. AS  
603 performed the statistical analysis. AS, PS and YM wrote the manuscript. PS supervised the  
604 study.

## 605 **ACKNOWLEDGEMENTS**

606 We thank C. Giovanni Galizia for discussions initiating this research, Stefanie Neupert for  
607 programming the acquisition software and comments on the manuscript, Jana Hörsch for  
608 contributing to pilot experiments and comments on the manuscript, Charles Ellen for

609 comments on the manuscript, FIBERFLON (Konstanz) for donating Teflon-coated fiberglass  
610 fabric.

611

## 612 REFERENCES

- 613 **Abu, F., Wang, J. G., Oh, Y., Deng, J., Neubert, T. A. and Suh, G. S. B.** (2018). Communicating the  
614 nutritional value of sugar in *Drosophila*. *Proc. Natl. Acad. Sci.* **115**, 201719827.
- 615 **Alem, S., Perry, C. J., Zhu, X., Loukola, O. J., Ingraham, T., Søvik, E. and Chittka, L.** (2016). Associative  
616 Mechanisms Allow for Social Learning and Cultural Transmission of String Pulling in an Insect.  
617 *PLOS Biol.* **14**, e1002564.
- 618 **Avarguès-Weber, A. and Chittka, L.** (2014). Local enhancement or stimulus enhancement?  
619 Bumblebee social learning results in a specific pattern of flower preference. *Anim. Behav.* **97**,  
620 185–191.
- 621 **Barron, A. B.** (2000). Anaesthetising *Drosophila* for behavioural studies. *J. Insect Physiol.* **46**, 439–  
622 442.
- 623 **Bartelt, R. J., Schaner, A. M. and Jackson, L. L.** (1985). cis-Vaccenyl acetate as an aggregation  
624 pheromone in *Drosophila melanogaster*. *J. Chem. Ecol.* **11**, 1747–1756.
- 625 **Bartholomew, N. R., Burdett, J. M., Vandenbrooks, J. M., Quinlan, M. C. and Call, G. B.** (2015).  
626 Impaired climbing and flight behaviour in *Drosophila melanogaster* following carbon dioxide  
627 anaesthesia. *Sci. Rep.* **5**, 1–10.
- 628 **Battesti, M., Moreno, C., Joly, D. and Mery, F.** (2012a). Spread of Social Information and Dynamics of  
629 Social Transmission within *Drosophila* Groups. *Curr. Biol.* **22**, 309–313.
- 630 **Battesti, M., Moreno, C., Joly, D. and Mery, F.** (2012b). Spread of social information and dynamics of  
631 social transmission within *Drosophila* groups. *Curr. Biol.* **22**, 309–313.
- 632 **Becher, P. G., Flick, G., Rozpędowska, E., Schmidt, A., Hagman, A., Lebreton, S., Larsson, M. C.,  
633 Hansson, B. S., Piškur, J., Witzgall, P., et al.** (2012). Yeast, not fruit volatiles mediate *Drosophila*  
634 *melanogaster* attraction, oviposition and development. *Funct. Ecol.* **26**, 822–828.
- 635 **Berman, G. J., Bialek, W. and Shaevitz, J. W.** (2016). Predictability and hierarchy in *Drosophila*  
636 behavior. *Proc. Natl. Acad. Sci. U. S. A.* **113**, 11943–11948.
- 637 **Branson, K., Robie, A. A., Bender, J., Perona, P. and Dickinson, M. H.** (2009). High-throughput  
638 ethomics in large groups of *Drosophila*. *Nat. Methods* **6**, 451–7.
- 639 **Breugel, F. van, Huda, A. and Dickinson, M. H.** (2017). *Drosophila* have distinct activity-gated  
640 pathways that mediate attraction and aversion to CO<sub>2</sub>. *bioRxiv* 227991.
- 641 **Burke, C. J., Huetteroth, W., Oswald, D., Perisse, E., Krashes, M. J., Das, G., Gohl, D., Silies, M.,  
642 Certel, S. and Waddell, S.** (2012). Layered reward signalling through octopamine and dopamine  
643 in *Drosophila*. *Nature* **492**, 433–437.
- 644 **Chabaud, M. A., Isabel, G., Kaiser, L. and Preat, T.** (2009). Social Facilitation of Long-Lasting Memory  
645 Retrieval in *Drosophila*. *Curr. Biol.* **19**, 1654–1659.
- 646 **Cholé, H., Carcaud, J., Mazeau, H., Famié, S., Arnold, G. and Sandoz, J.-C.** (2019). Social Contact Acts  
647 as Appetitive Reinforcement and Supports Associative Learning in Honeybees. *Curr. Biol.* **29**, 1–  
648 7.
- 649 **Czaczkes, T. J., Grüter, C., Jones, S. M. and Ratnieks, F. L. W.** (2011). Synergy between social and  
650 private information increases foraging efficiency in ants. *Biol. Lett.* **7**, 521–524.
- 651 **Danchin, E., Nöbel, S., Pocheville, A., Dagaëff, A.-C., Demay, L., Alphand, M., Ranty-Roby, S., van  
652 Renssen, L., Monier, M., Gazagne, E., et al.** (2018). Cultural flies: Conformist social learning in

- 653 fruitflies predicts long-lasting mate-choice traditions. *Science* (80-. ). **362**, 1025–1030.
- 654 **Durisko, Z. and Dukas, R.** (2013). Attraction to and learning from social cues in fruitfly larvae. *Proc R*  
655 *Soc B* **280**, 20131398.
- 656 **Fabre, C. C. G., Hedwig, B., Conduit, G., Lawrence, P. A., Goodwin, S. F. and Casal, J.** (2012).  
657 Substrate-Borne Vibratory Communication during Courtship in *Drosophila melanogaster*. *Curr.*  
658 *Biol.* **22**, 2180–2185.
- 659 **Felsenberg, J., Barnstedt, O., Cognigni, P., Lin, S. and Waddell, S.** (2017). Re-evaluation of learned  
660 information in *Drosophila*. *Nature* **544**, 240–244.
- 661 **Fernandez, R. W., Akinleye, A. A., Nurilov, M., Feliciano, O., Lollar, M., Aijuri, R. R., O'Donnell, J. M.**  
662 **and Simon, A. F.** (2017). Modulation of social space by dopamine in *Drosophila melanogaster*,  
663 but no effect on the avoidance of the *Drosophila* stress odorant. *Biol. Lett.* **13**,
- 664 **Ferreira, C. H. and Moita, M. A.** (2019). Safety in numbers is mediated by motion cues and depends  
665 on lobula columnar neurons in *Drosophila melanogaster*. *bioRxiv* 629311.
- 666 **Frisch, K. Von** (1965). *Die tänze der Bienen*.
- 667 **Galizia, C. G.** (2014). Olfactory coding in the insect brain: Data and conjectures. *Eur. J. Neurosci.* **39**,  
668 1784–1795.
- 669 **Giraldeau, L.-A. and Caraco, T.** (2000). *Social foraging theory*. Princeton University Press.
- 670 **Golden, S. and Dukas, R.** (2014). The value of patch-choice copying in fruit flies. *PLoS One* **9**,
- 671 **Haverkamp, A., Hansson, B. S. and Knaden, M.** (2018). Combinatorial Codes and Labeled Lines: How  
672 Insects Use Olfactory Cues to Find and Judge Food, Mates, and Oviposition Sites in Complex  
673 Environments. *Front. Physiol.* **9**, 49.
- 674 **Huetteroth, W., Perisse, E., Lin, S., Klappenbach, M., Burke, C. and Waddell, S.** (2015). Sweet taste  
675 and nutrient value subdivide rewarding dopaminergic neurons in *drosophila*. *Curr. Biol.* **25**, 751–  
676 758.
- 677 **Itskov, P. M. and Ribeiro, C.** (2013). The dilemmas of the gourmet fly: the molecular and neuronal  
678 mechanisms of feeding and nutrient decision making in *Drosophila*. *Front. Neurosci.* **7**, 12.
- 679 **Jallon, J.-M.** (1984). A few chemical words exchanged by *Drosophila*. *Behav. Genet.* **14**, 441–478.
- 680 **Kacsoh, B. Z., Bozler, J., Ramaswami, M. and Bosco, G.** (2015). Social communication of predator-  
681 induced changes in *Drosophila* behavior and germ line physiology. *Elife* **4**,
- 682 **Keeseey, I. W., Koerte, S., Retzke, T., Haverkamp, A., Hansson, B. S. and Knaden, M.** (2016). Adult  
683 Frass Provides a Pheromone Signature for *Drosophila* Feeding and Aggregation. *J. Chem. Ecol.*  
684 **42**, 739–747.
- 685 **Kellogg, F., Frizel, D. and Wright, R.** (1962). The Olfactory Guidance of Flying Insects. IV. *Drosophila*.  
686 *Can. Entomol.* **94**, 884–888.
- 687 **Kim, I. S. and Dickinson, M. H.** (2017). Idiopathic Path Integration in the Fruit Fly *Drosophila*  
688 *melanogaster*. *Curr. Biol.* **27**, 2227–2238.e3.
- 689 **Kitamoto, T.** (2001). Conditional modification of behavior in *Drosophila* by targeted expression of a  
690 temperature-sensitive *shibire* allele in defined neurons. *J. Neurobiol.* **47**, 81–92.
- 691 **Kohn, N. R., Reaume, C. J., Moreno, C., Burns, J. G., Sokolowski, M. B. and Mery, F.** (2013). Social  
692 Environment Influences Performance in a Cognitive Task in Natural Variants of the Foraging  
693 Gene. *PLoS One* **8**, e81272.

- 694 **Korner-Nievergelt, F., Roth, T., von Felten, S., Guelat, J., Almasi, B., Korner-Nievergelt, P., Guélat, J.,**  
695 **Almasi, B. and Korner-Nievergelt, P.** (2015). *Bayesian data analysis in ecology using linear*  
696 *models with R, BUGS, and Stan*. Academic Press.
- 697 **Lagasse, F., Devaud, J.-M. and Mery, F.** (2009). A Switch from Cycloheximide-Resistant Consolidated  
698 Memory to Cycloheximide-Sensitive Reconsolidation and Extinction in *Drosophila*. *J. Neurosci.*  
699 **29**, 2225–2230.
- 700 **Leadbeater, E. and Dawson, E. H.** (2017). A social insect perspective on the evolution of social  
701 learning mechanisms. *Proc. Natl. Acad. Sci.* **114**, 7838–7845.
- 702 **Lebreton, S., Borrero-Echeverry, F., Gonzalez, F., Solum, M., Wallin, E. A., Hedenström, E., Hansson,**  
703 **B. S., Gustavsson, A. L., Bengtsson, M., Birgersson, G., et al.** (2017). A *Drosophila* female  
704 pheromone elicits species-specific long-range attraction via an olfactory channel with dual  
705 specificity for sex and food. *BMC Biol.* **15**, 88.
- 706 **Lefranc, A., Jeune, B., Thomas-Orillard, M. and Danchin, E.** (2001). Non-independence of individuals  
707 in a population of *Drosophila melanogaster*: effects on spatial distribution and dispersal. *C. R.*  
708 *Acad. Sci. III.* **324**, 219–27.
- 709 **Lihoreau, M., Clarke, I. M., Buhl, J., Sumpter, D. J. T. and Simpson, S. J.** (2016). Collective selection  
710 of food patches in *Drosophila*. *J. Exp. Biol.* **219**, 668–675.
- 711 **Lin, C.-C., Prokop-Prigge, K. A., Preti, G. and Potter, C. J.** (2015). Food odors trigger *Drosophila* males  
712 to deposit a pheromone that guides aggregation and female oviposition decisions. *Elife* **4**, 1–26.
- 713 **Liu, C., Plaçais, P.-Y., Yamagata, N., Pfeiffer, B. D., Aso, Y., Friedrich, A. B., Siwanowicz, I., Rubin, G.**  
714 **M., Preat, T. and Tanimoto, H.** (2012). A subset of dopamine neurons signals reward for odour  
715 memory in *Drosophila*. *Nature* **488**, 512–516.
- 716 **Mercier, D., Tsuchimoto, Y., Ohta, K. and Kazama, H.** (2018). Olfactory Landmark-Based  
717 Communication in Interacting *Drosophila*. *Curr. Biol.* **28**, 2624-2631.e5.
- 718 **Mery, F., Belay, A. T., So, A. K.-C., Sokolowski, M. B. and Kawecki, T. J.** (2007). Natural  
719 polymorphism affecting learning and memory in *Drosophila*. *Proc. Natl. Acad. Sci.* **104**, 13051–  
720 13055.
- 721 **Mery, F., Varela, S. A. M., Danchin, É., Blanchet, S., Parejo, D., Coolen, I. and Wagner, R. H.** (2009).  
722 Public Versus Personal Information for Mate Copying in an Invertebrate. *Curr. Biol.* **19**, 730–734.
- 723 **Miller, R. and Stephen, W.** (1966). Spatial Relationships in Flocks of Sandhill Cranes (*Grus*  
724 *Canadensis*). *Ecology* **47**, 323–327.
- 725 **Navarro, J. and del Solar, E.** (1975). Pattern of spatial distribution in *Drosophila melanogaster*.  
726 *Behav. Genet.* **5**, 9–16.
- 727 **Osborne, K. A., Robichon, A., Burgess, E., Butland, S., Shaw, R. A., Coulthard, A., Pereira, H. S.,**  
728 **Greenspan, R. J. and Sokolowski, M. B.** (1997). Natural Behavior Polymorphism Due to a cGMP-  
729 Dependent Protein Kinase of *Drosophila*. *Science (80-. )*. **277**, 834–836.
- 730 **Owald, D. and Waddell, S.** (2015). Olfactory learning skews mushroom body output pathways to  
731 steer behavioral choice in *Drosophila*. *Curr. Opin. Neurobiol.* **35**, 178–184.
- 732 **R Core Team** (2018). R: A Language and Environment for Statistical Computing.
- 733 **Ramdya, P., Lichocki, P., Cruchet, S., Frisch, L., Tse, W., Floreano, D. and Benton, R.** (2014).  
734 Mechanosensory interactions drive collective behaviour in *Drosophila*. *Nature* **519**, 233–236.
- 735 **Sarin, S. and Dukas, R.** (2009). Social learning about egg-laying substrates in fruitflies. *Proceedings*.



- 736 *Biol. Sci.* **276**, 4323–8.
- 737 **Schneider, J., Dickinson, M. H. and Levine, J. D.** (2012). Social structures depend on innate  
738 determinants and chemosensory processing in *Drosophila*. *Proc. Natl. Acad. Sci.* **109**, 17174–  
739 17179.
- 740 **Schwaerzel, M., Heisenberg, M. and Zars, T.** (2002). Extinction antagonizes olfactory memory at the  
741 subcellular level. *Neuron* **35**, 951–960.
- 742 **Schwaerzel, M., Monastirioti, M., Scholz, H., Friggi-Grelin, F., Birman, S. and Heisenberg, M.** (2003).  
743 Dopamine and octopamine differentiate between aversive and appetitive olfactory memories in  
744 *Drosophila*. *J. Neurosci.* **23**, 10495–502.
- 745 **Semmelhack, J. L. and Wang, J. W.** (2009). Select *Drosophila* glomeruli mediate innate olfactory  
746 attraction and aversion. *Nature* **459**, 218–223.
- 747 **Simon, A. F., Chou, M. T., Salazar, E. D., Nicholson, T., Saini, N., Metchev, S. and Krantz, D. E.** (2012).  
748 A simple assay to study social behavior in *Drosophila*: Measurement of social space within a  
749 group. *Genes, Brain Behav.* **11**, 243–252.
- 750 **Suh, G. S. B., Wong, A. M., Hergarden, A. C., Wang, J. W., Simon, A. F., Benzer, S., Axel, R. and**  
751 **Anderson, D. J.** (2004). A single population of olfactory sensory neurons mediates an innate  
752 avoidance behaviour in *Drosophila*. *Nature* **431**, 854–859.
- 753 **Tauber, E. and Eberl, D. F.** (2003). Acoustic communication in *Drosophila*. *Behav. Processes* **64**, 197–  
754 210.
- 755 **Tempel, B. L., Bonini, N., Dawson, D. R. and Quinn, W. G.** (1983). Reward learning in normal and  
756 mutant *Drosophila*. *Proc. Natl. Acad. Sci. U. S. A.* **80**, 1482–6.
- 757 **Templeton, J. J. and Giraldeau, L.-A.** (1996). Vicarious sampling; the use of personal and public  
758 information by starlings.pdf. *Behav Ecol Sociobiol.* **38**, 105–114.
- 759 **Thum, A. S., Jenett, A., Ito, K., Heisenberg, M. and Tanimoto, H.** (2007). Multiple memory traces for  
760 olfactory reward learning in *Drosophila*. *J. Neurosci.* **27**, 11132–8.
- 761 **Tinette, S., Zhang, L. and Robichon, A.** (2004). Cooperation between *Drosophila* flies in searching  
762 behavior. *Genes, Brain Behav.* **3**, 39–50.
- 763 **Tinevez, J. Y., Perry, N., Schindelin, J., Hoopes, G. M., Reynolds, G. D., Laplantine, E., Bednarek, S.**  
764 **Y., Shorte, S. L. and Eliceiri, K. W.** (2017). TrackMate: An open and extensible platform for  
765 single-particle tracking. *Methods* **115**, 80–90.
- 766 **Torney, C., Neufeld, Z. and Couzin, I. D.** (2009). Context-dependent interaction leads to emergent  
767 search behavior in social aggregates. *Proc. Natl. Acad. Sci.* **106**, 22055–22060.
- 768 **Trannoy, S., Chowdhury, B. and Kravitz, E. A.** (2015). Handling alters aggression and loser effect  
769 formation in *Drosophila melanogaster*. *Learn. Mem.* **22**, 64–68.
- 770 **Valone, T. J.** (1989). Group Foraging, Public Information, and Patch Estimation. *Oikos* **56**, 357–363.
- 771 **Ward, P. and Zahavi, A.** (1973). Importance of certain assemblages of birds as information centers  
772 for food-finding. *Ibis (Lond. 1859)*. **115**, 517–534.
- 773 **Wilson, R. I.** (2013). Early olfactory processing in *Drosophila*: mechanisms and principles. *Annu. Rev.*  
774 *Neurosci.* **36**, 217–41.
- 775 **Worden, B. D. and Papaj, D. R.** (2005). Flower choice copying in bumblebees. *Biol. Lett.* **1**, 504–507.
- 776



777 **SUPPLEMENTARY MATERIALS**

778 **Data S1: Tracking data**

779

780 **Table S1: Bayesian probabilities comparing conditioned approach probability between groups.**

781 Red values indicate significant differences.

782

| <b>Time (minute)</b>                         | <b>Group</b> | <b>Pair &gt;</b> | <b>Small &gt;</b> | <b>Large &gt;</b> |
|----------------------------------------------|--------------|------------------|-------------------|-------------------|
| All test (1 <sup>st</sup> -7 <sup>th</sup> ) | Single       | 0.187            | 0.856             | 0.926             |
|                                              | Pair         |                  | 0.968             | 0.983             |
|                                              | Small        |                  |                   | 0.677             |
| 1 <sup>st</sup>                              | Single       | 0.031            | 0.277             | 0.195             |
|                                              | Pair         |                  | 0.906             | 0.856             |
|                                              | Small        |                  |                   | 0.393             |
| 2 <sup>nd</sup>                              | Single       | 0.502            | 0.840             | 0.976             |
|                                              | Pair         |                  | 0.839             | 0.976             |
|                                              | Small        |                  |                   | 0.904             |
| 3 <sup>rd</sup>                              | Single       | 0.009            | 0.740             | 0.976             |
|                                              | Pair         |                  | 0.998             | > 0.999           |
|                                              | Small        |                  |                   | 0.941             |
| 4 <sup>th</sup>                              | Single       | 0.214            | 0.713             | 0.991             |
|                                              | Pair         |                  | 0.912             | 0.998             |
|                                              | Small        |                  |                   | 0.974             |
| 5 <sup>th</sup>                              | Single       | 0.033            | 0.727             | 0.945             |
|                                              | Pair         |                  | 0.991             | > 0.999           |
|                                              | Small        |                  |                   | 0.857             |
| 6 <sup>th</sup>                              | Single       | 0.301            | 0.792             | 0.993             |
|                                              | Pair         |                  | 0.906             | 0.998             |
|                                              | Small        |                  |                   | 0.968             |
| 7 <sup>th</sup>                              | Single       | 0.221            | 0.906             | 0.992             |
|                                              | Pair         |                  | 0.980             | > 0.999           |
|                                              | Small        |                  |                   | 0.887             |

783

784

785 **Table S2: Bayesian probabilities comparing conditioned approach probability against chance (0.5).**  
 786 Red values indicate significant differences.  
 787

| <b>Time (minute)</b>                          | <b>Group</b> | <b><i>p</i>(Conditioned approach probability &gt; 0.5)</b> |
|-----------------------------------------------|--------------|------------------------------------------------------------|
| All test (1 <sup>st</sup> – 7 <sup>th</sup> ) | Single       | > 0.999                                                    |
|                                               | Pair         | > 0.999                                                    |
|                                               | Small        | 0.983                                                      |
|                                               | Large        | > 0.999                                                    |
| 1 <sup>st</sup>                               | Single       | 0.997                                                      |
|                                               | Pair         | 0.640                                                      |
|                                               | Small        | 0.983                                                      |
|                                               | Large        | 0.963                                                      |
| 2 <sup>nd</sup>                               | Single       | 0.998                                                      |
|                                               | Pair         | 0.997                                                      |
|                                               | Small        | > 0.999                                                    |
|                                               | Large        | > 0.999                                                    |
| 3 <sup>rd</sup>                               | Single       | 0.997                                                      |
|                                               | Pair         | 0.359                                                      |
|                                               | Small        | > 0.999                                                    |
|                                               | Large        | > 0.999                                                    |
| 4 <sup>th</sup>                               | Single       | 0.964                                                      |
|                                               | Pair         | 0.767                                                      |
|                                               | Small        | 0.993                                                      |
|                                               | Large        | > 0.999                                                    |
| 5 <sup>th</sup>                               | Single       | 0.993                                                      |
|                                               | Pair         | 0.499                                                      |
|                                               | Small        | > 0.999                                                    |
|                                               | Large        | > 0.999                                                    |
| 6 <sup>th</sup>                               | Single       | 0.861                                                      |
|                                               | Pair         | 0.64253                                                    |
|                                               | Small        | 0.983                                                      |
|                                               | Large        | > 0.999                                                    |
| 7 <sup>th</sup>                               | Single       | 0.642                                                      |
|                                               | Pair         | 0.232                                                      |
|                                               | Small        | 0.983                                                      |
|                                               | Large        | > 0.999                                                    |

788

789

790 **Table S3: Bayesian probabilities comparing distance distributions between experimental (Exp.) groups and**  
 791 **simulated (Sim.) groups.**  
 792 Red values indicate significant differences.  
 793

| <b>Group</b> | <b>Distance bin (mm)</b> | <b><i>p</i>(Sim. group &gt; Exp. group)</b> |
|--------------|--------------------------|---------------------------------------------|
| <b>Pair</b>  | 0-5                      | 0.220                                       |
|              | 5-10                     | 0.260                                       |
|              | 10-15                    | 0.231                                       |
|              | 15-20                    | 0.141                                       |
|              | 20-25                    | 0.367                                       |
|              | 25-30                    | <b>0.978</b>                                |
|              | 30-35                    | <b>0.977</b>                                |
|              | 35-40                    | 0.742                                       |
|              | 40-45                    | 0.625                                       |
|              | 45-50                    | 0.244                                       |
|              | 50-55                    | 0.220                                       |
|              | 55-60                    | 0.555                                       |
|              | 60-65                    | 0.844                                       |
| <b>Small</b> | 0-5                      | 0.069                                       |
|              | 5-10                     | 0.054                                       |
|              | 10-15                    | 0.483                                       |
|              | 15-20                    | 0.556                                       |
|              | 20-25                    | 0.759                                       |
|              | 25-30                    | 0.810                                       |
|              | 30-35                    | 0.782                                       |
|              | 35-40                    | 0.679                                       |
|              | 40-45                    | 0.813                                       |
|              | 45-50                    | 0.797                                       |
|              | 50-55                    | 0.554                                       |
|              | 55-60                    | 0.429                                       |
|              | 60-65                    | <b>0.992</b>                                |
| <b>Large</b> | 0-5                      | <b>0.003</b>                                |
|              | 5-10                     | <b>0.040</b>                                |
|              | 10-15                    | 0.243                                       |
|              | 15-20                    | 0.373                                       |
|              | 20-25                    | 0.492                                       |
|              | 25-30                    | 0.772                                       |
|              | 30-35                    | 0.894                                       |
|              | 35-40                    | <b>0.971</b>                                |
|              | 40-45                    | <b>0.959</b>                                |
|              | 45-50                    | <b>0.956</b>                                |
|              | 50-55                    | 0.778                                       |
|              | 55-60                    | 0.627                                       |
|              | 60-65                    | 0.887                                       |

794

795

796

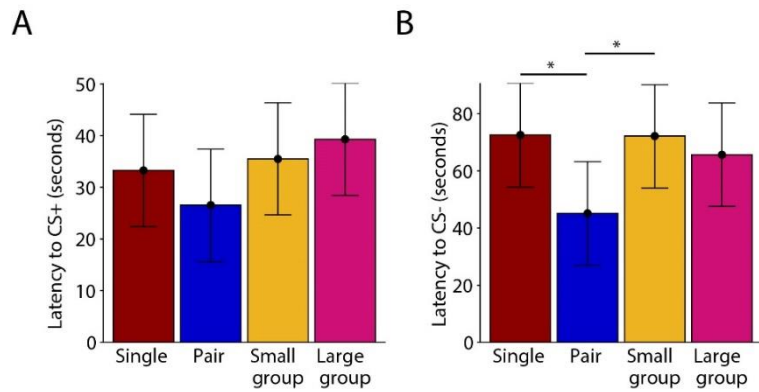

797  
798  
799  
800  
801  
802  
803  
804

**Figure S1: Latency to approach the CS+ and CS- in the test.**

(A) Latency to the CS+: the first time point an individual fly reaches the CS+ for the single fly (red), pair (blue), small group (yellow) and the large group (pink) during the test. Points indicate the mean latency per group size; whiskers indicate the 95 % credible intervals. Stars represent significance between groups (\*:  $p(\text{small group} > \text{pair}) > 0.95$ ).

(B) Same as (A) but for the CS-.

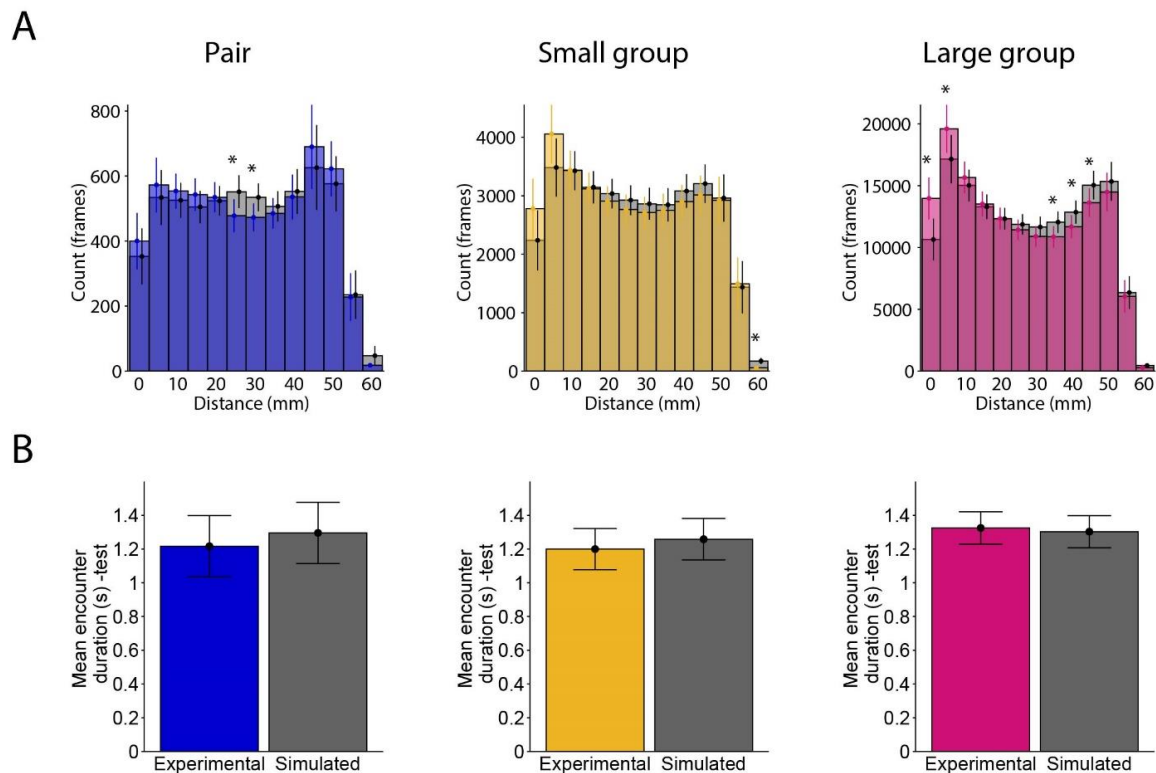

805  
806  
807  
808  
809  
810  
811  
812  
813  
814  
815  
816  
817  
818  
819

**Figure S2: Quantifying inter-fly encounters during the test.**

(A) The number of inter-fly distances during the test for flies conditioned in pairs (left), small groups (middle) and large groups (right). The first bin ranges from 0 mm to 2.5 mm, and the following bins represent a range of 5 mm i.e. the 10 mm bin ranges from 7.5 mm to 12.5 mm. Bars represent the mean number of distances per bin between real groups of flies (pair: blue, small group: yellow, large group: pink) and between simulated groups of flies (grey). Vertical lines represent the 95 % credible intervals. Videos were recorded at 15 frames / s. Bars of the experimental and simulated number of distances within the same bin were compared to each other. Stars indicate significantly different numbers of distances between the experimental and simulated distances within a bin ( $N = 30$  real or simulated experimental runs).

(B) Mean encounter length per experimental run for the pair (blue, left), small group (yellow, middle) and large group (pink, right). The corresponding simulated groups of flies are shown in grey. Bars represent the mean across experimental runs. Whiskers represent the 95 % credible intervals. Stars represent significant differences between the real and simulated groups.
